# Supplementary material for: Optimal contact definition for reconstruction of Contact Maps
Source: Springer Nature journal article supplement (doi:10.1186/1471-2105-11-283), 2010-05-27
Supplement: 12859_2009_3740_MOESM1_ESM.pdf [file 12859_2009_3740_MOESM1_ESM.pdf]

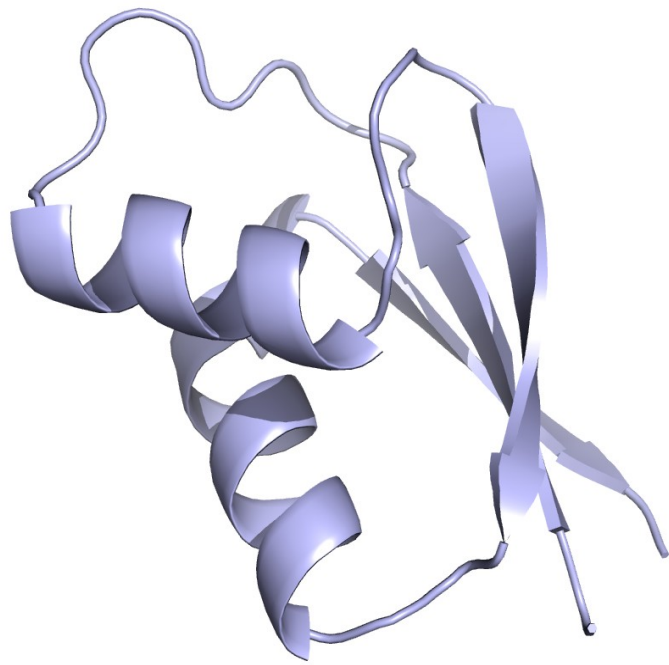

1. Contact map decomposition

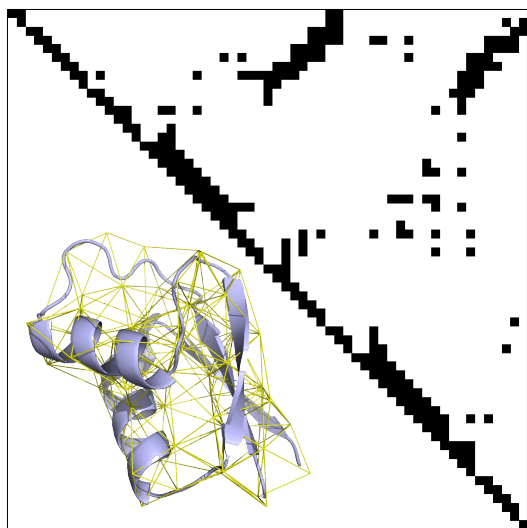

3. Comparison to native

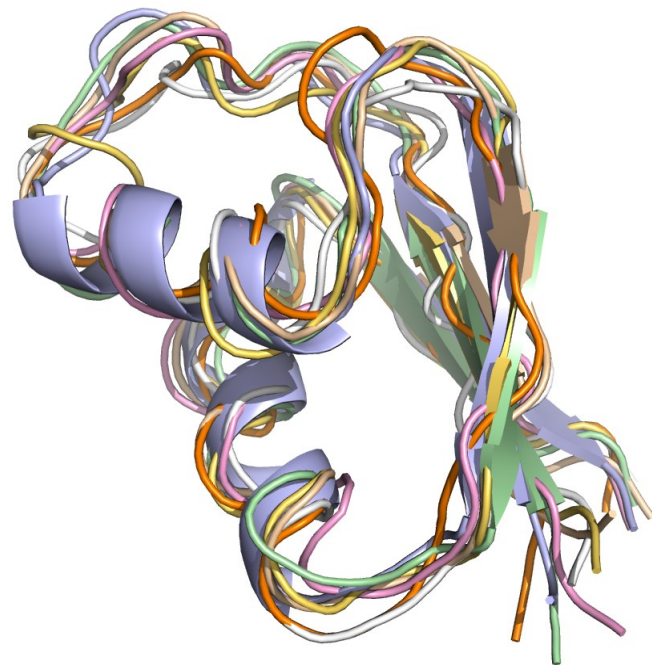

2. Reconstruction
