# Supplementary material for: Optimal contact definition for reconstruction of Contact Maps
Source: Springer Nature journal article supplement (doi:10.1186/1471-2105-11-283), 2010-05-27

Average reconstruction for 60 PDB representatives

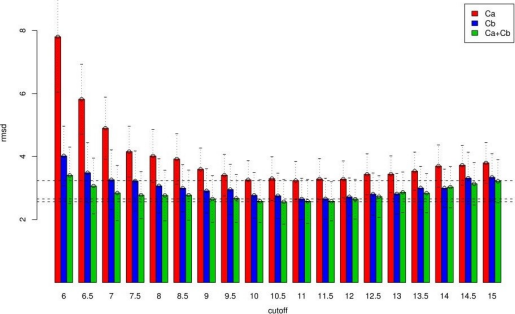

Supplement: 12859_2009_3740_MOESM2_ESM.pdf [file 12859_2009_3740_MOESM2_ESM.pdf]
